# Supplementary material for: Genetic fabrication of functional silk mats with improved cell proliferation activity for medical applications
Source: Royal Society of Chemistry journal article supplement (doi:10.1039/c9bm01285k), 2019-01-01
Supplement: c9bm01285k1.pdf [file c9bm01285k1.pdf]

## Supporting Information

### Genetic Fabrication of Functional Silk Mats with Improved Cell Proliferation Activity for Medical Application

Yuancheng Wang<sup>a, b</sup>, Sheng Xu<sup>a, b</sup>, Riyuan Wang<sup>a, b</sup>, Wenjing Chen<sup>a, b</sup>, Kai Hou<sup>a, b</sup>, Chi Tian<sup>a, b</sup>, Yanting Jia<sup>a, b</sup>, Qianqian Yang<sup>a, b</sup>, Ling Yu<sup>d</sup>, Zhisong Lu<sup>d</sup>, Ping Zhao<sup>a, b</sup>, Qingyou Xia<sup>\*a, b, c</sup>, Feng Wang<sup>\*a, b, c</sup>

<sup>a</sup>Biological Science Research Center, Southwest University, Chongqing 400715, People's Republic of China

<sup>b</sup>Chongqing Key Laboratory of Sericultural Science, Southwest University, Chongqing 400715, People's Republic of China

<sup>c</sup>Chongqing Engineering and Technology Research Center for Novel Silk Materials, Southwest University, Chongqing 400715, People's Republic of China

<sup>d</sup>Institute for Clean Energy & Advanced Materials, Faculty of Materials & Energy, Southwest University, Chongqing, 400715, People's Republic of China.

\*Correspondence: xiaqy@swu.edu.cn; wangf1986@swu.edu.cn

Present address:

Biological Science Research Center, Southwest University, Chongqing 400715, People's Republic of China

Supplementary materials

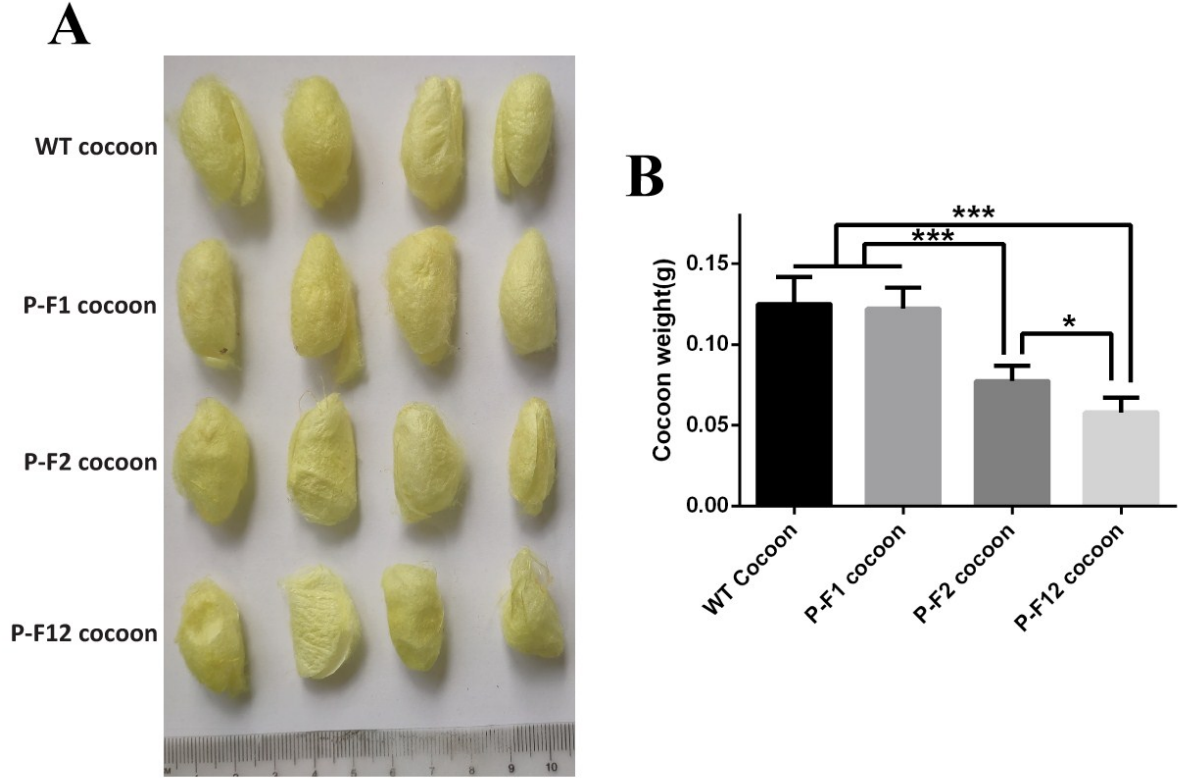

**Supplementary fig. 1** Cocoon shape and weight analysis of P-F1, P-F2 and P-F12 silkworms. (A) cocoon shape of P-F1, P-F2 and P-F12 silkworms. (B) cocoon weight analysis of P-F1, P-F2 and P-F12 silkworms.

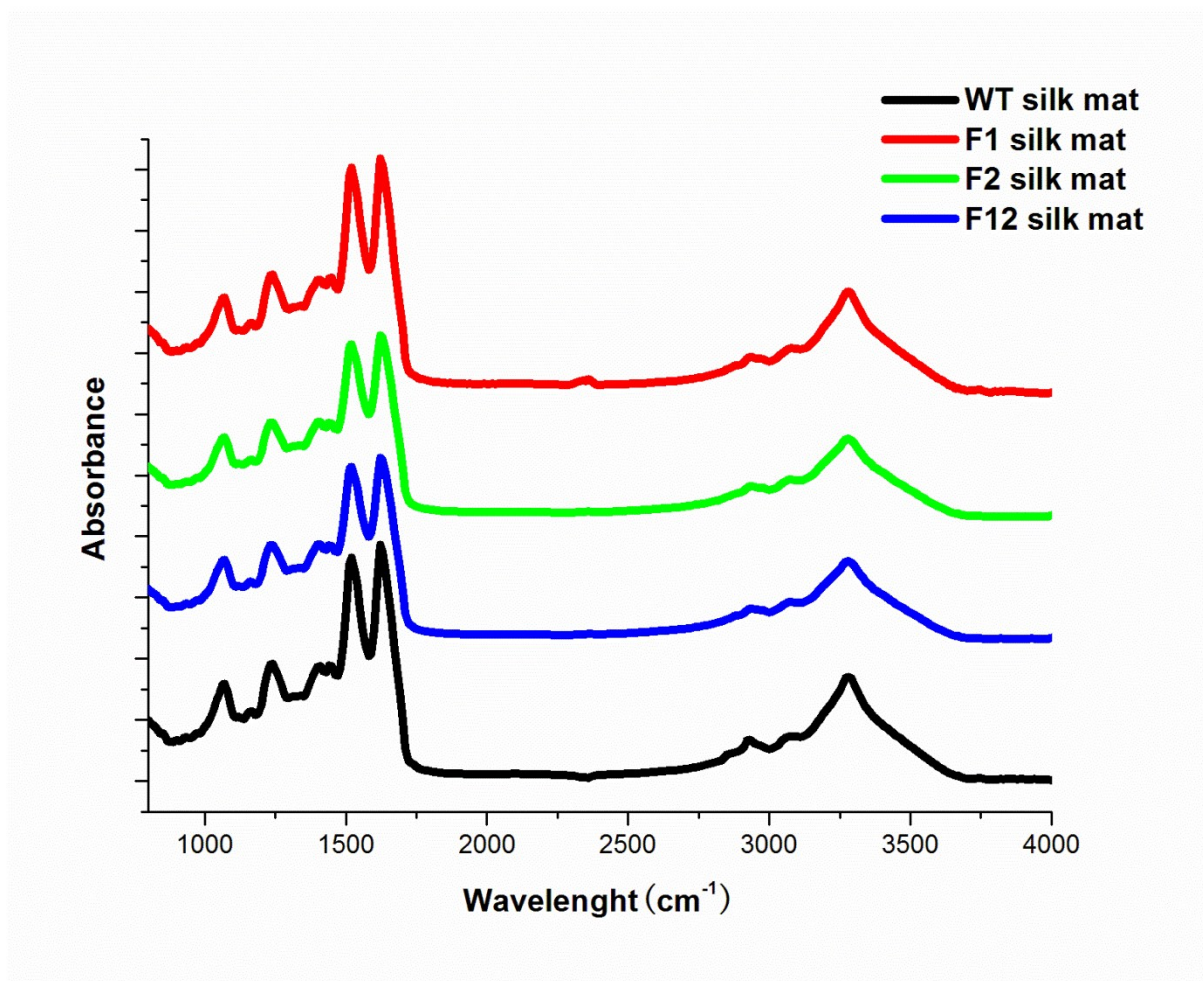

**Supplementary fig. 2** The infrared absorption spectra of WT, F1, F2 and F12 silk mats during 800  $\text{cm}^{-1}$  and 4000  $\text{cm}^{-1}$ .

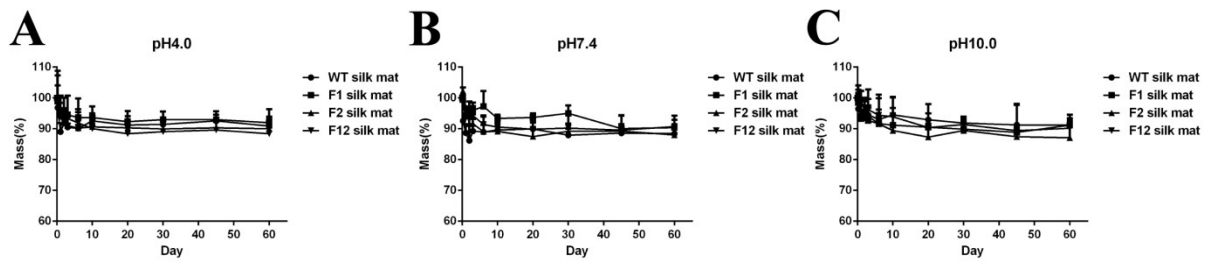

**Supplementary fig. 3** Stability analysis of silk mats in different pH conditions. (A), (B) and (C) respectively indicated the stability of WT, F1, F2 and F12 silk mats in the PBS buffer with a pH of 4.0, 7.4 and 10.0.

## **Nucleic acid sequence and amino acid sequence of FGF1, FGF2 and FGF1-FGF2 fusion genes**

### **>Optimized human FGF1 sequence**

Nucleic acid sequence:

ATGGTGAGATTCGTGCTCTGCTGTACCTTGATCGCTCTCGCTGCCCTGTCAGTTAAGGCCTTCGGAC  
ACCACCCGGGCAACAGAGACACTATGTTCAACTTACCTCCAGGCAATTACAAAAAGCCTAAACTGT  
TGTATTGCTCAAACGGTGGACACTTTTTGAGAATCCTCCCAGACGGCACCGTGGATGGTACGAGAG  
ACCGCTCTGATCAACATATCCAACCTCAGCTGAGCGCTGAATCCGTGGGAGAGGTTTACATTAAGT  
CAACAGAAACTGGACAATATTTGGCCATGGACACAGATGGACTCTTATACGGCAGCCAGACTCCG  
AATGAAGAGTGCTTGTTCCCTCGAACGTTTAGAAGAGAACCACTACAATACCTATATATCGAAAAAG  
CATGCTGAGAAAAACTGGTTTGTCTGGTCTTAAAAAGAATGGAAGTTGTAAACGTGGCCCAAGGACT  
CACTATGGTCAGAAGGCCATCTTATTCCTTCCGCTGCCCGTATCATCTGACTAA

Amino acid sequence:

MVRFVLCCTLIALAALSVKAFGHHPGNRDTMFNLPPGNYKKPKLLYCSNGGHFLRILPDGTVDGTRDR  
SDQHIQLQLSAESVGEVYIKSTETGQYLAMDTDGLLYGSQTPNEECLFLERLEENHYNTYISKKHAEKN  
WVGLKKNNGSCKRGPRTHYGQKAILFLPLPVSSD

**>Optimized human FGF2 sequence**

Nucleic acid sequence:

ATGGTGAGATTCGTGCTCTGCTGTACCTTGATCGCTCTCGCTGCCCTGTCAGTTAAGGCCTTCGGAC  
ACCACCCGGGCAACAGAGACACTATGGCGGCGGGCTCAATCACAACCTTACCAGCGTTACCAGAA  
GATGGAGGCTCGGGCGCATTTCCTCCAGGACATTTCAAGGACCCTAAGAGACTCTACTGCAAAAAC  
GGTGGATTCTTCTGAGAATACACCCTGACGGCAGAGTGGATGGTGTAGAGAAAAGAGCGACCC  
ACACATAAAATTGCAACTCCAGGCTGAAGAAAGAGGTGTGGTTTCCATCAAAGGAGTCTGTGCTAA  
TAGATACTTGGCCATGAAGGAAGACGGAAGACTGTTGGCCAGCAAATGCGTGACCGATGAATGCT  
TCTTCTTCGAAAGACTCGAATCCAACAATTACAACACATACAGATCGAGAAAGTACTAGTTGGT  
ACGTGGCTTTGAAAAGAACAGGACAATACAAACCTCGGCTCTAAGACTGGCCCCGGGTCAGAAGGCC  
ATACTGTTCTTGCCCATGAGCGCTAAATCCTAA

Amino acid sequence:

MVRFVLCCTLIALAALSVKAFGHHPGNRDTMAAGSITLTPALPEDGGSGAFPPGHFKDPKRLYCKNGG  
FFLRIHPDGRVDGVREKSDPHIKLQLQAEERGVSISIKGVCANRYLAMKEDGRLLASKCVTDECFFFERL  
ESNNYNTYRSRKYTSWYVALKRTGQYKLGSKTGPQKAILFLPMSAKS

**>Optimized human FGF1-FGF2 sequence**

Nucleic acid sequence:

ATGGTGAGATTCGTGCTCTGCTGTACCTTGATCGCTCTCGCTGCCCTGTCAGTTAAGGCCTTCGGAC  
ACCACCCGGGCAACAGAGACACTATGTTCAACTTACCTCCAGGCAATTACAAAAAGCCTAAACTGT  
TGTATTGCTCAAACGGTGGACACTTTTTGAGAATCCTCCCAGACGGCACCGTGGATGGTACGAGAG  
ACCGCTCTGATCAACATATCCAACCTCAGCTGAGCGCTGAATCCGTGGGAGAGGTTTACATTAAGT  
CAACAGAAACTGGACAATATTTGGCCATGGACACAGATGGACTCTTATACGGCAGCCAGACTCCG  
AATGAAGAGTGCTTGTTCCTCGAACGTTTAGAAGAGAACCACTACAATACCTATATATCGAAAAAG  
CATGCTGAGAAAACTGGTTTTGTCGGTCTTAAAAAGAATGGAAGTTGTAAACGTGGCCCAAGGACT  
CACTATGGTCAGAAGGCCATCTTATTCCTTCCGCTGCCCGTATCATCTGACAGAGCCAAGAGAGGA  
TCAGGCGCTACTAATTTCTCTCTCCTGAAACAGGCCGGCGATGTGGAAGAAAACCCGGGTCCCACC  
ACCATGGTGAGATTCGTGCTCTGCTGTACCTTGATCGCTCTCGCTGCCCTGTCAGTTAAGGCCTTCG  
GACACCACCCGGGCAACAGAGACACTATGGCGGGCGGGCTCAATCACAACCTTACCAGCGTTACCA  
GAAGATGGAGGCTCGGGCGCATTTCCTCCAGGACATTTCAAGGACCCTAAGAGACTCTACTGCAA  
AACGGTGGATTCTTCTGAGAATACACCCTGACGGCAGAGTGGATGGTGTAGAGAAAAGAGCGA  
CCCACACATAAAATTGCAACTCCAGGCTGAAGAAAGAGGTGTGGTTTCCATCAAAGGAGTCTGTGC  
TAATAGATACTTGCCATGAAGGAAGACGGAAGACTGTTGGCCAGCAAATGCGTGACCGATGAAT  
GCTTCTTCTCGAAAGACTCGAATCCAACAATTACAACACATACAGATCGAGAAAGTACACTAGTT  
GGTACGTGGCTTTGAAAAGAACAGGACAATACAACTCGGCTCTAAGACTGGCCCGGGTCAGAAG  
GCCATACTGTTCTTGCCCATGAGCGCTAAATCCTAA

Amino acid sequence:

MVRFVLCCTLIALAALSVKAFGHHPGNRDTMFNLPPGNYKPKLLYCSNGGHFLRILPDGTVDGTRDR  
SDQHIQLQLSAESVGEVYIKSTETGQYLAMDTDGLLYGSQTPNEECLFLERLEENHYNTYISKKHAEN  
WFGVGLKKNGSCKRGPRTHYGQKAILFLPLPVSSDRAKRGSGATNFSLLKQAGDVEENPGPTTMVRFVL  
CCTLIALAALSVKAFGHHPGNRDTMAAGSITLTPALPEDGGSGAFPPGHFKDPKRLYCKNGGFFLRIHP  
DGRVDGVREKSDPHIKLQLQAEERGVSIVKVCANRYLAMKEDGRLLASKCVTDECFERLESNNYN  
TYRSRKYTSWYVALKRTGQYKLGSKTGPQKAILFLPMSAKS

Note: red sequence is FGF1 gene, blue sequence is FGF2 gene and 2A sequence is marked with yellow background.
